# Supplementary material for: Prediction of IOP Reduction after Cataract Surgery in Medically Treated Normal-Tension Glaucoma: A Nomogram Study in South Korea
Source: Research Square preprint supplement (doi:10.21203/rs.3.rs-7517774/v1), 2025-09-18
Supplement: Supplementary file 1 [file 6ed155c6183df2277b9ca401.pdf]

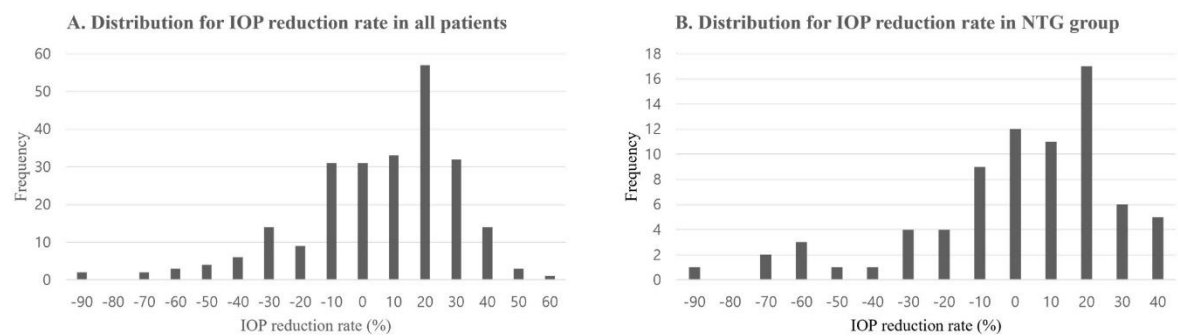

**Supplementary Figure S1. Distribution for IOP reduction rate**

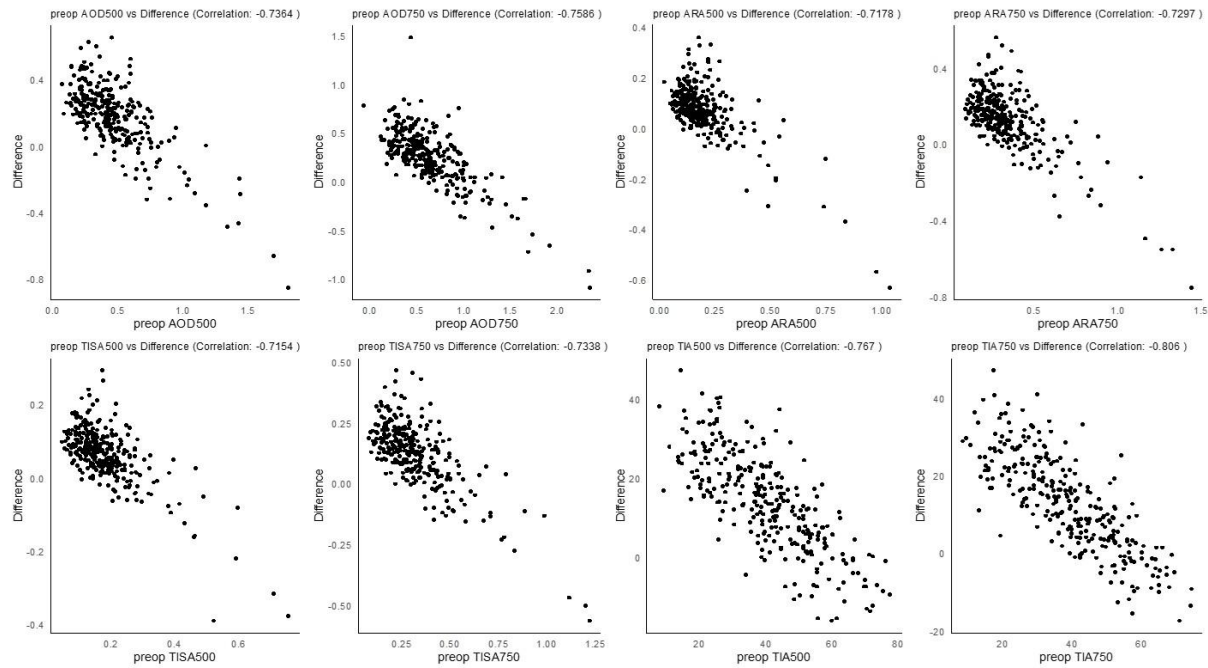

**Supplementary Figure S2. Scatter plot of angle difference before and after surgery**

The relationship between pre-operative angle parameters and angle differences before and after surgery was evaluated (N=292). All anterior chamber angle parameters exhibit strong inverse correlations with postoperative changes ( $r \approx -0.70$  to  $-0.80$ ), suggesting that narrower preoperative angles are associated with more pronounced anatomical widening following surgery.

AOD, angle opening distance; ARA, angle recess area; TISA, trabecular-iris space area; TIA, trabecular iris angle.

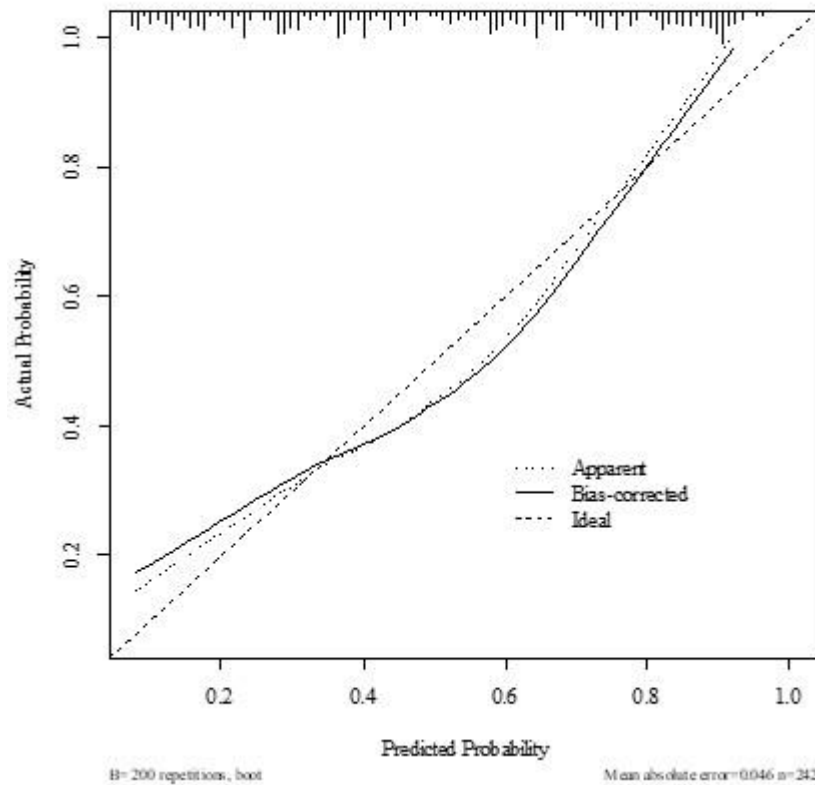

### Supplementary Figure S3. Calibration plot of the predictive nomogram

The calibration curve demonstrates good agreement between predicted and observed probabilities of achieving  $\geq 10\%$  IOP reduction at 6 months postoperatively. The bias-corrected line closely follows the ideal 45-degree reference, indicating accurate calibration. A slight overestimation was noted at lower predicted probabilities and minor underestimation in the mid-range; however, the overall mean absolute error was 0.046, reflecting satisfactory calibration and robust predictive performance of the model.

IOP, intraocular pressure
